# Supplementary material for: NK cell-derived exosomes carry miR-207 and alleviate depression-like symptoms in mice
Source: Springer Nature journal article supplement (doi:10.1186/s12974-020-01787-4), 2020-04-22

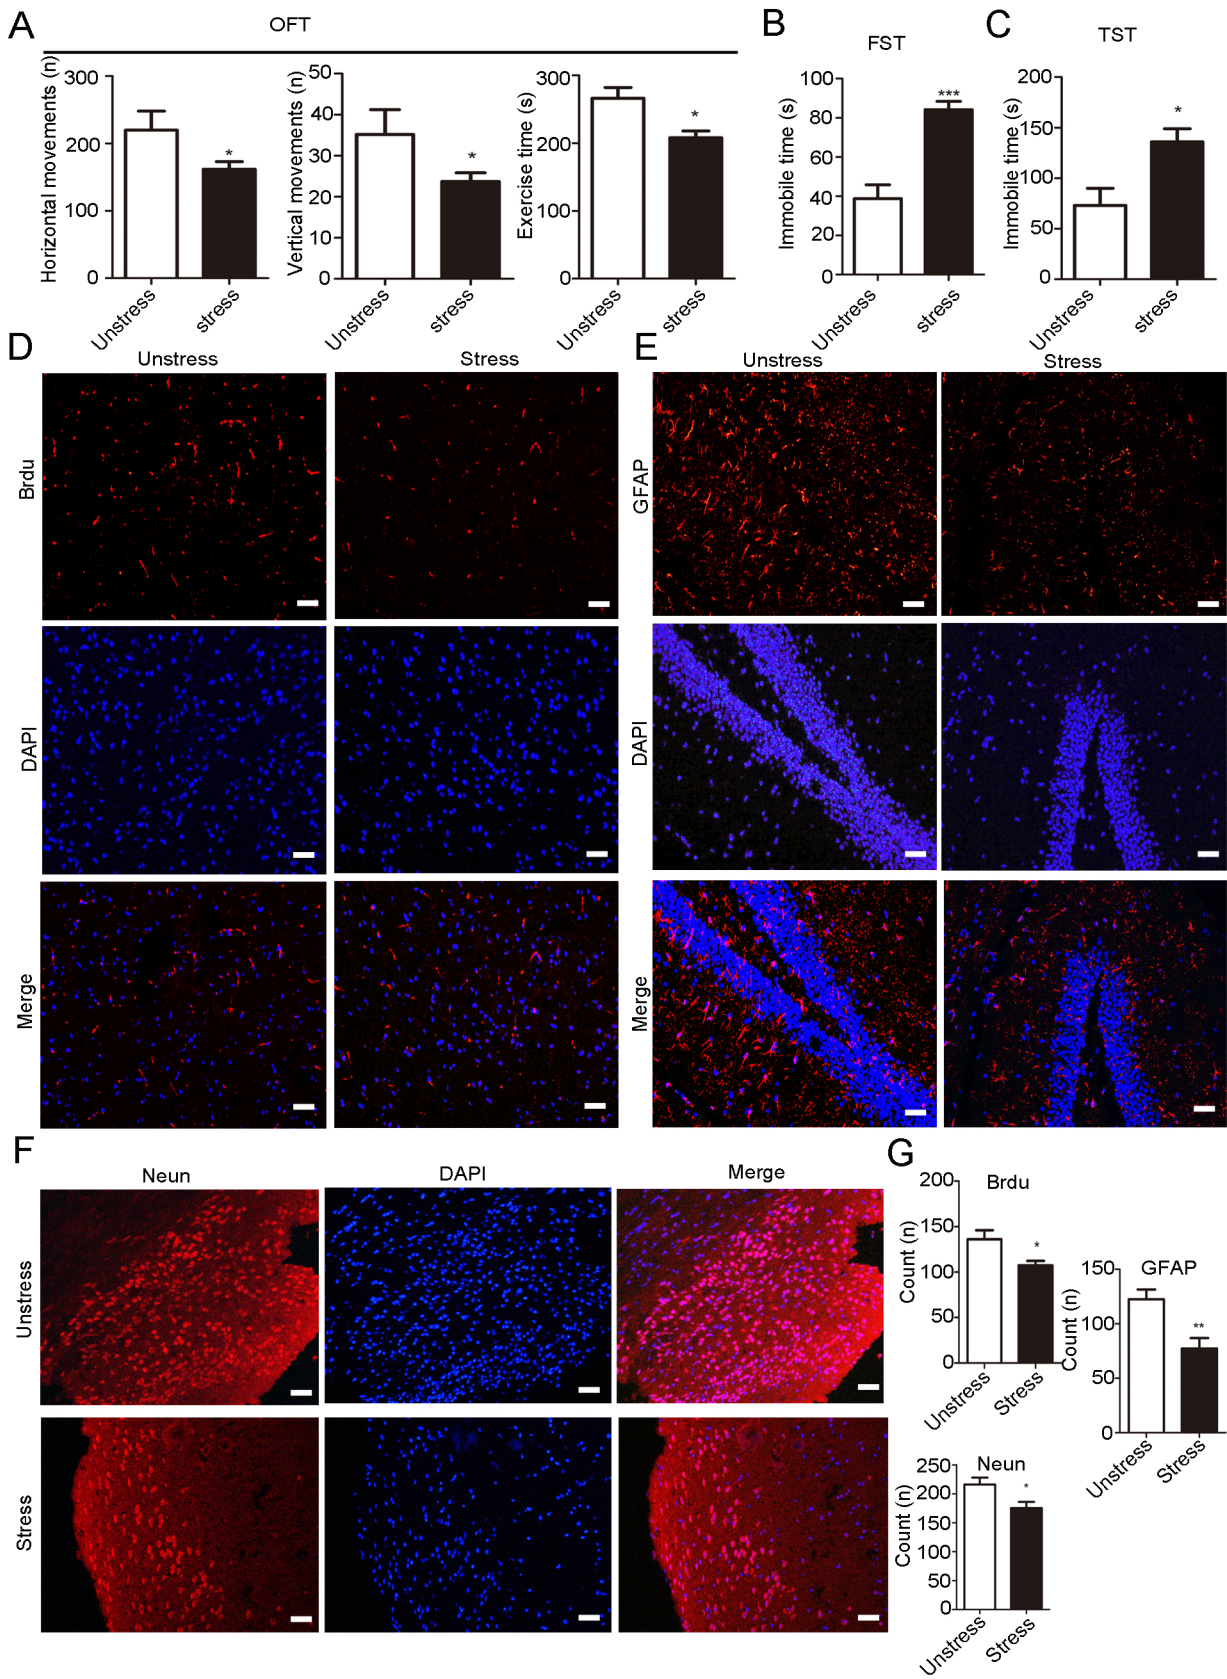

Supplement: MOESM2 [file 17919014]
